# Supplementary material
Source: PubMed Central journal article supplement (PMC2676041)
Supplement: M806563200_1.pdf [file M806563200_1.pdf]

**A**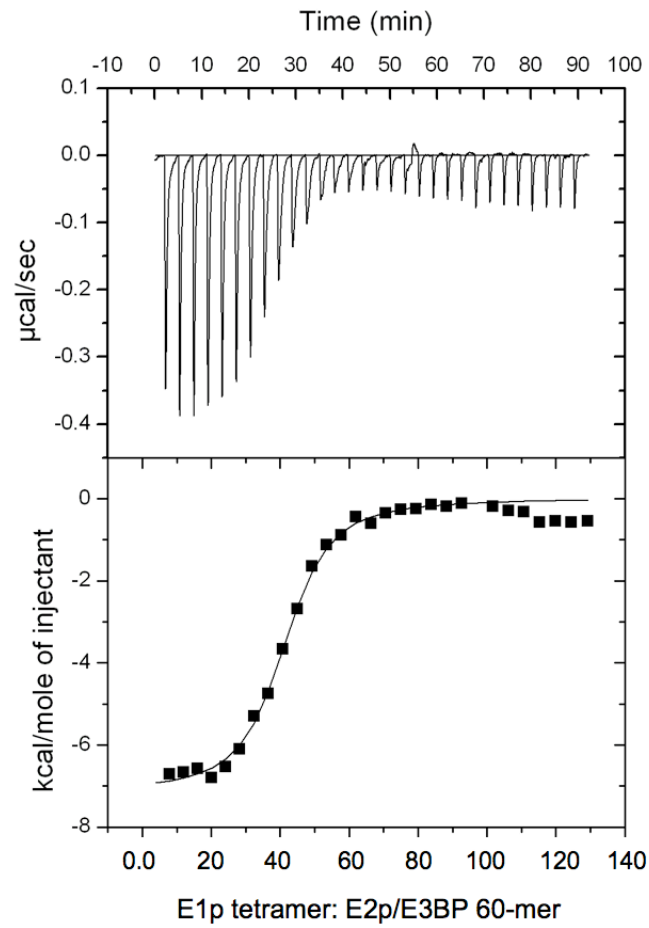**B**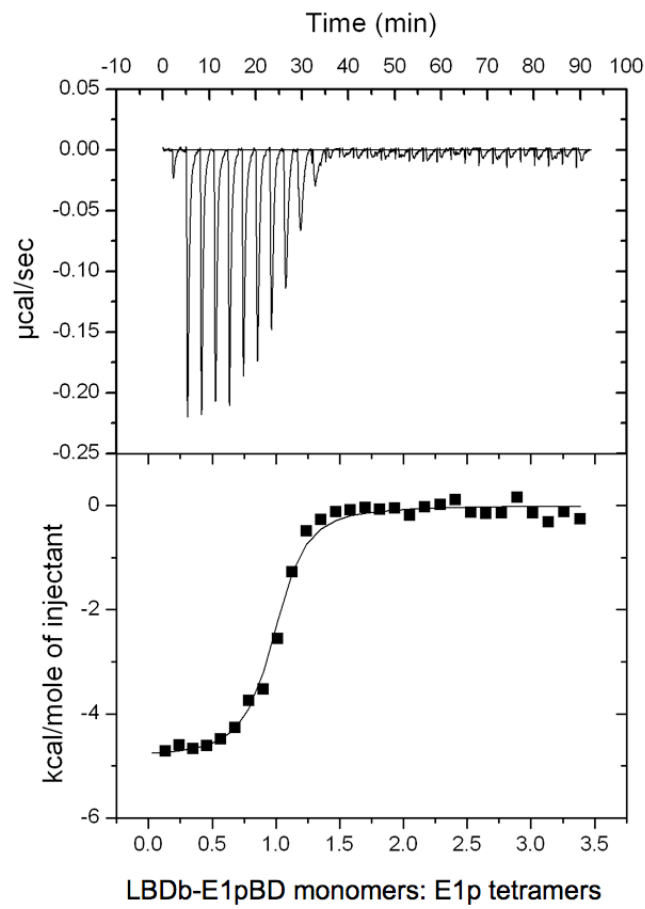

**Supplemental Figure S1. Isothermal titration calorimetry of E1p binding to E1pBD and the E2p/E3BP core.** (A) E1p binding to the 60-meric E2p/E3BP core. The E1p heterotetramer (150  $\mu\text{M}$ ) was titrated into the 60-meric E2p/E3BP core (51  $\mu\text{M}$ , based on the monomer concentration of E2p and E3BP subunits) in the reaction cell. The binding isotherm yields a  $K_d$  of  $218 \pm 8.6$  nM and an  $n$ -value of  $40.5 \pm 3.6$  in triplicate experiments. (B) E1pBD binding to the E1p component. The LBD<sub>b</sub>-E1pBD construct (186  $\mu\text{M}$ ) was titrated into the E1p heterotetramers (18  $\mu\text{M}$ ) in the reaction cell. The binding isotherm produces a  $K_d$  of  $103 \pm 6.2$  nM and an  $n$ -value of  $0.96 \pm 0.09$  in triplicate experiments. The results indicate a 1: 1 binding stoichiometry between the E1pBD and the E1p heterotetramer.

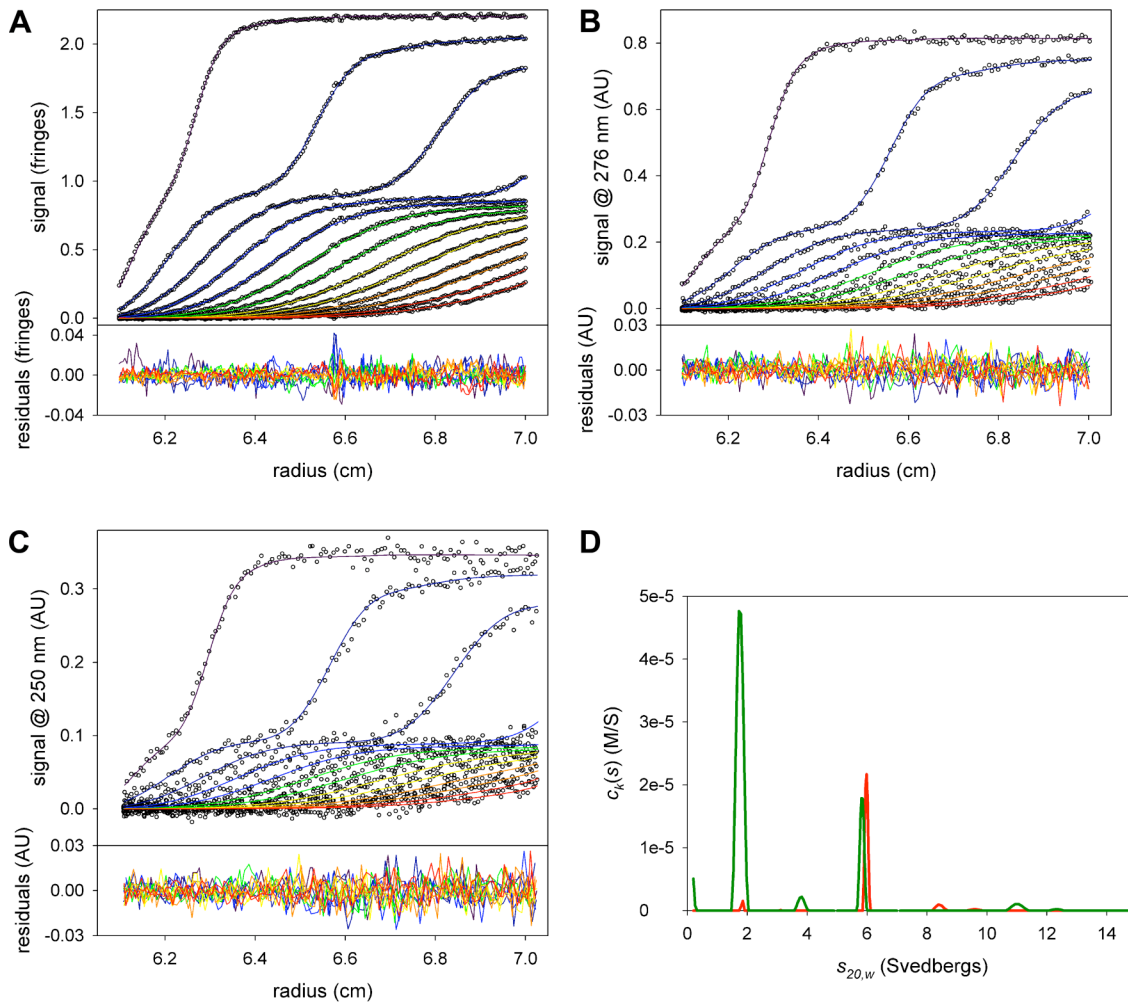

**Supplemental Figure S2.  $c_k(s)$  distributions obtained from multisignal sedimentation velocity experiments with LBDb-E3BD and the E3 dimer.** (A) Data and fit to the data for the IF optical system. (B) ABS data taken at a wavelength of 276 nm and fit to those data. (C) ABS data taken at 250 nm and fit to those data. (D) The  $c_k(s)$  distributions. That for E3 is shown as a red line, while that for LBDb-E3BD
